# Supplementary material
Source: publisher site journal article supplement (https://www.dovepress.com/article/275334)
Supplement: Supplementary file 1 [file get_supplementary_file.php]

Supplementary Table 1. Recurrent gene mutations implicated in the pathogenesis of DLBCL.

| **Pathway** | **Gene** |
| --- | --- |
| NF-κB signaling pathway | *BIRC3, CARD11, CD79B, IKBKB, ITPKB, MYD88, PIM1, TNFAIP3* |
| Epigenetic regulation | *CHD2, CREBBP, EP300, EZH2, HIST1H1E, KMT2D, MEF2B, NSD2, ZMYM3* |
| Apoptosis | *ATM, BCL2, GNA13, MYC, TP53* |
| Transcription factors | *BCOR, PRDM1, TBL1XR1* |
| Immune surveillance | *CD58* |
| NOTCH signaling pathway | *FBXW7, NOTCH1, NOTCH2, SPEN* |
| BCR signaling pathway | *EGR2, ID3, KLHL6, TCF3* |
| DNA repair/cell-cycle | *CCND3* |
| JAK-STAT | *STAT6* |
| RNA splicing | *SF3B1* |
| MAPK | *BRAF* |
